# Supplementary material for: Ditopic azathioether macrocycles as hosts for transition metal saltsElectronic supplementary information (ESI) available: full experimental details. See http://www.rsc.org/suppdata/cc/b1/b109486f/
Source: Royal Society of Chemistry journal article supplement (doi:10.1039/b109486f), 2001-12-06
Supplement: b109486f.doc [file b109486f.doc]

**Supplementary Material**

*Experimental Section*

**Synthesis of ButNHC(O)NHC(O)CH2Cl –** This synthetic procedure is a modification of the literature preparation of PhNHC(O)NHC(O)CH2Cl.

Neat chloroacetylchloride (5.34 g, 0.047 mol) was added to a stirred suspension of *tert*-butylurea (5.00 g, 0.043 mol) in toluene (50 mL) at room temperature. The mixture was heated to 80 C for 1.75 h, during which the solids dissolved. After this time, the clear solution was allowed to cool and the solvents removed under vacuum. The off-white residues were extracted into Et2O (20 mL), filtered through glass fiber paper and cooled to –20 C, yielding 5.50 g, 66 % of the chloroacylurea as a crystalline, colorless solid. 1H NMR (CDCl3): δH 9.57 (br.s, 1H, NH), 8.22 (br.s, 1H, NH), 4.09 (s, 2H, CH2), 1.38 (s, 9H, CMe3)

**Synthesis of L1 –** Solid [18]aneN2S4 (0.106 g, 0.325 mmol), chloroacylurea (0.125 g, 0.649 mmol), K2CO3 (0.090 g, 0.649 mmol) and KI (*ca*. 5 mg) were combined in CH3CN (15 mL) and heated at reflux temperature for 2 h. The colorless mixture was evaporated to dryness and the white residues extracted into CH2Cl2 (2 x 5 mL), filtered through glass fiber and evaporated yielding 0.104 g, 52 % of L1 as a white powder. Anal. Found: C, 48.31; H, 8.28; N, 12.98. C26H50N6O4S4 requires: C, 48.87; H, 7.89; N, 13.15 %

1H NMR (CDCl3): *δ*H 9.19 (br.s, 2H, NH), 8.18 (br.s, 2H, NH), 3.19 (s, 4H, N-CH2), 2.80 (m’s, 24H, macrocyclic H), 1.39 (s, 18H, But)

**Synthesis of L2** – A solution of the chloroacylurea (1.26 g, 6.54 mmol) in CH3CN (25 mL) was added to a stirred mixture of [12]aneNS3 (1.46 g, 6.54 mmol), K2CO3 (1.60 g, 11.5 mmol), and KI (*ca*. 5 mg) in CH3CN (25 mL) and heated at reflux temperature for 2.5 h. After this time, the mixture was evaporated to dryness, and extracted into CH2Cl2 (2 x 20 mL). The resultant colorless filtrate was evaporated to *ca*. 10 mL, and Et2O (5 mL) was added, causing colorless solids to precipitate which were isolated on a glass frit, washed with Et2O (2 x 20 mL) and dried under vacuum yielding (0.159 g, 64 %) of L2 as a white powder.

Anal. Found: C, 47.13; H, 7.49; N, 10.91. C15H29N3O2S3 requires: C, 47.46; H, 7.70; N, 11.07 % 1H NMR (CDCl3): *δ*H 8.98 (br.s, 1H, NH), 8.16 (br.s, 1H, NH), 3.18 (s, 2H, CH2), 2.83 (s, 8H, S-CH2), 2.78 (m, 4H, N-CH2), 2.67 (m, 4H, N-CH2), 1.39 (s, 9H, CMe3). 1H NMR (CD3CN): *δ*H 9.01 (br.s, 1H, NH), 8.23 (br.s, 1H, NH), 3.19 (s, 2H, CH2), 2.84 (s, 8H, S-CH2), 2.78 (m, 4H, N-CH2), 2.67 (m, 4H, N-CH2), 1.37 (s, 9H, CMe3). MS (FAB, +ve NBA matrix): *m/z* 380 [M+ + H, 100 %], 307 [M+ - NHBut, 90%]

**Synthesis of PdCl2[L1] (1) –** A mixture of PdCl2 (0.029 g, 0.162 mmol) and L1 (0.100 g, 0.162 mmol) in CH3CN (10 mL) was heated at reflux temperature for 3.5 h, resulting in the formation of a yellow slurry. The solvents were evaporated and the yellow residues extracted into hot methanol (20 mL) and filtered while hot through glass fiber paper. The yellow filtrate was concentrated to a bubbly solid, which yielded 0.047 g, 37 % of **1** as yellow plates after crystallization by diffusion of Et2O into a methanol solution.

Anal. Found: C, 34.70; H, 5.77; N, 9.32. C26H50Cl2N6O4PdS4 requires: C, 38.30; H, 6.25; N, 10.32%

1H NMR (CD3OD): *δ*H 8.40 (br.s, 1H, NH), 3.9 to 3.0 (br.m’s, 28H, macrocycle H/ CH2), 1.37 (s, 18H, But). MS (FAB, +ve NBA matrix): *m/z* 744 [M+ - 2Cl 100 %]

**Synthesis of {CuCl[L2]}2CuCl3 (2)** – A slurry of L2 (0.061 g, 0.161 mmol) in methanol (5 mL) was added to a stirred, pale green solution of CuCl2.2H2O (0.027 g, 0.161 mmol) in methanol (5 mL) at room temperature. The solids rapidly dissolved and the resultant deep green solution was stirred at ambient temperature for 1 h, after which the solvents were removed under vacuum. The green, oily residues were extracted into CH3CN (5 mL), filtered through glass fiber paper and allowed to evaporate, yielding 0.03 mg, (32 %) of **2** as dark green plates. Anal. Found: C, 30.74; H, 4.95; N, 7.58. C30H58Cl6Cu3N6O4S6 requires: C, 30.99; H, 5.03; N, 7.23 % MS (FAB, +ve NBA matrix): *m/z* 477 (CuCl[L2], 45 %), 442 (Cu[L2], 50 %)

**Synthesis of AgNO3[L2] (3) –** Solid L2 (0.100 g, 0.263 mmol) was added to a stirred solution of AgNO3 (0.045 g, 0.263 mmol) in CH3CN (10 mL) at room temperature. The resulting clear solution was stirred for 1 h during which a colorless solid precipitated. More CH3CN (5 mL) was added and the mixture heated to reflux temperature for 30 min, during which the solids dissolved. The clear hot mixture was filtered through glass fiber paper and cooled to -20 ºC, yielding 0.08 g, 50 % of **3** as a light sensitive, microcrystalline solid. Anal. Found: C, 33.17; H, 5.39; N, 10.64. C15H29AgN4O5S3 requires: C, 32.79; H, 5.32; N, 10.20%. 1H NMR (CD3CN): *δ*H 8.85 (br.s, 1H, NH), 8.08 (br.s, 1H, NH), 3.40 (s, 2H, CH2), 2.85 (br.m's, 16H, macrocyclic CH2's), 1.35 (s, 9H, CMe3). MS (FAB, +ve NBA matrix): *m/z* 488 [M+ - NO3, 100 %]. IR (KBr disc): *ν* 3449 (vbr, m), 3299 (br, m), 1712 (s), 1348 (vs).

**Synthesis of PdCl2[L2] (4) –** A mixture of PdCl2 (0.070 g, 0.395 mmol) and L2 (0.150 g, 0.395 mmol) in CH3CN (25 mL) was heated at reflux temperature for 1.5 h, during which the majority of the solids dissolved. To this mixture was added methanol (3 mL) and the mixture boiled for a further 4 h. The resultant dark orange mixture was filtered through glass fiber paper and evaporated to dryness, yielding a glassy orange solid, which was then triturated with CH3CN (3 mL); the resultant orange solids (0.160 g, 73 %) were isolated by filtration and dried under vacuum. Anal. Found: C, 32.71; H, 4.97; N, 8.00. C15H29Cl2N3O2PdS3 requires: C, 32.35; H, 5.25; N, 7.54 %. 1H NMR (CD3OD): *δ*H 4.2 to 3.2 (br.m’s, 18H, macrocycle H/ CH2), 1.38 (s, 9H, But) 1H NMR (CD3CN): *δ*H 8.30 (br.s, 1H, NH), 8.15 (br.s, 1H, NH), 3.70 to 2.80 (m’s, 18H, macrocyclic H), 1.36 (s, 9H, But). MS (FAB, +ve NBA matrix): *m/z* 522 [M+ - Cl, 65 %], 484 [M+ - 2 Cl, 70%].
